# Supplementary material for: Dissecting Immune Cell Stat Regulation Network Reveals Biomarkers to Predict ICB Therapy Responders in Melanoma
Source: Research Square preprint supplement (doi:10.21203/rs.3.rs-113465/v1), 2020-11-25
Supplement: Supplementary file 1 [file b762a647a029341f96930e21.docx]

**Supplementary figures**


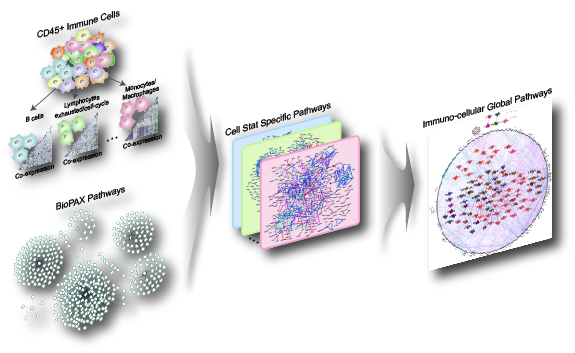


**Figure S1** Workflow describing construction of immuno-cellular global pathways


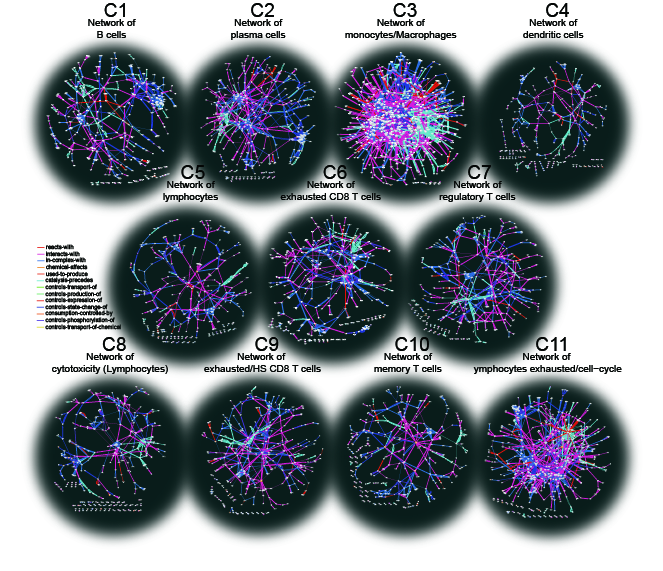


**Figure S2** eleven immuno-networks regarding immuno-cellular clusters


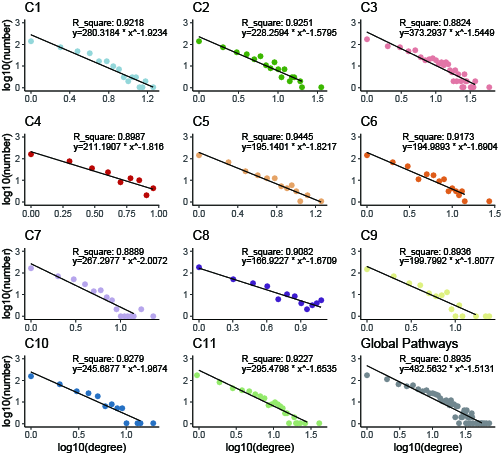


**Figure S3** Scale-free validation of all networks


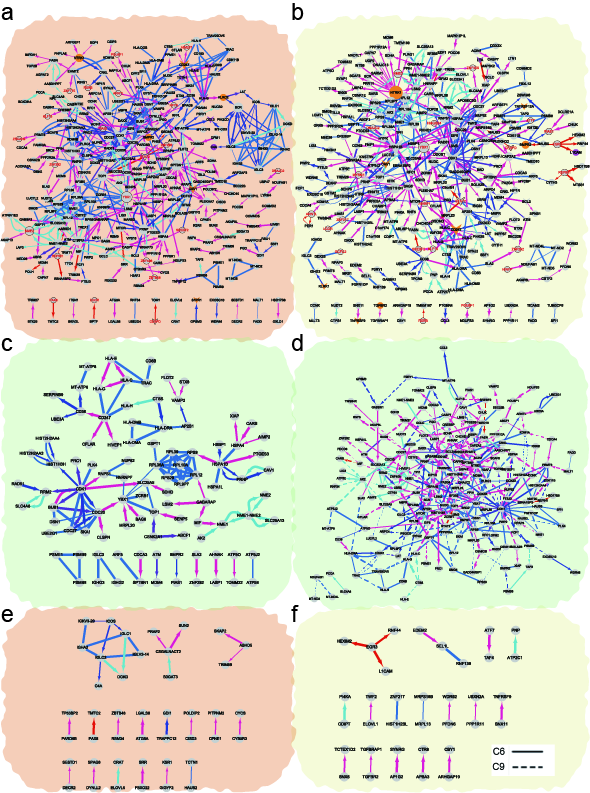


**Figure S4** Cross-talk of B cell networks (C1 and C2), T cell networks (C6 and C9), myeloid networks (C3 and C4)


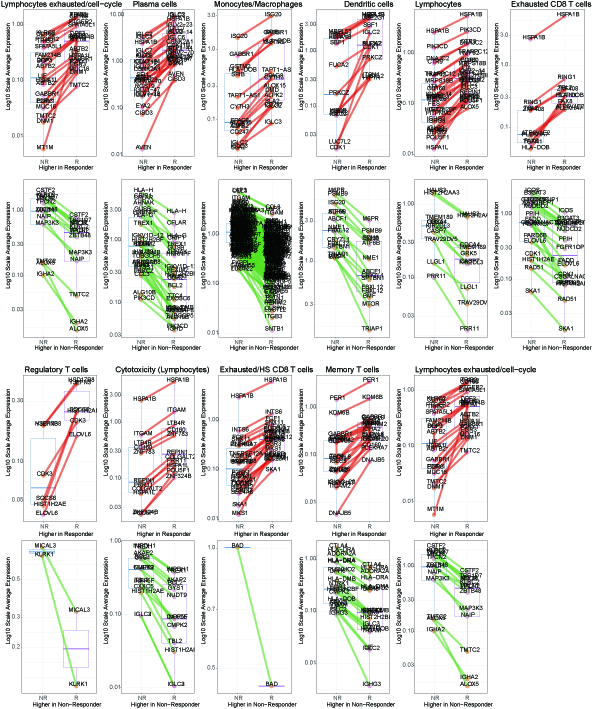


**Figure S5** Average expression of DEGs


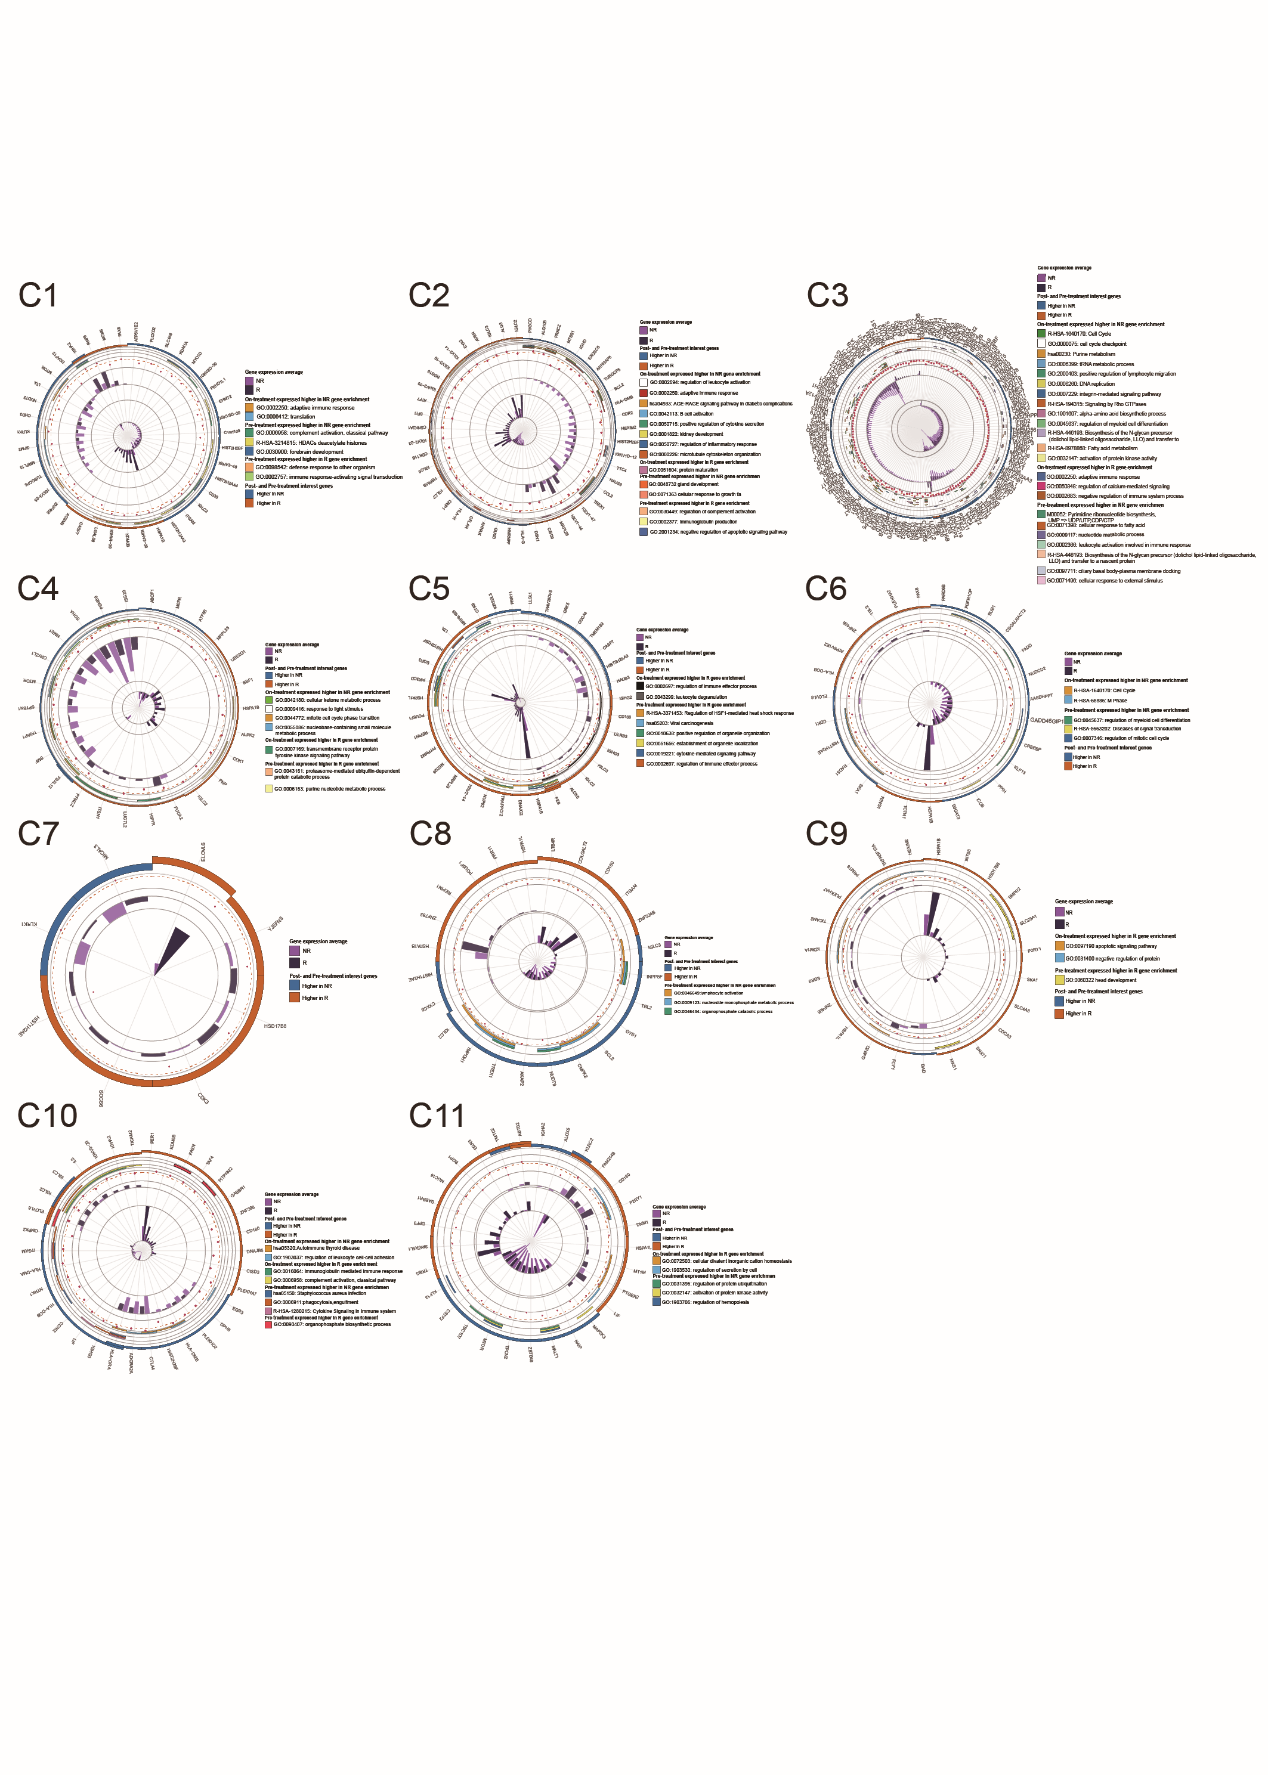


**Figure S6** Expression of DEGs in local networks
